# Supplementary material
Source: PubMed Central journal article supplement (PMC4077439)
Supplement: supp_the2013-0326_Supplemental_FigureS1.pdf [file supp_the2013-0326_Supplemental_FigureS1.pdf]

| Indication                                          | Duration from                                                            | Median<br>(months) | 10 <sup>th</sup> –90 <sup>th</sup> percentile<br>(months) |
|-----------------------------------------------------|--------------------------------------------------------------------------|--------------------|-----------------------------------------------------------|
| Surgery                                             | Registration until surgery                                               | 2.1                | 0.6–4.7                                                   |
| N=84                                                |                                                                          |                    |                                                           |
| For radiotherapy                                    | Registration until first<br>visit radiation oncologist                   | 1.8                | 0.2–5.2                                                   |
| N=965                                               |                                                                          |                    |                                                           |
| For radiotherapy                                    | Registration<br>until start radiotherapy                                 | 3.8                | 1.1–9.2                                                   |
| N=965                                               |                                                                          |                    |                                                           |
| <i>Curative radiotherapy</i>                        | <i>First visit radiation<br/>oncologist<br/>until start radiotherapy</i> | 1.7                | 0.1–5.3                                                   |
| N=231                                               |                                                                          |                    |                                                           |
| <i>Palliative radiotherapy</i>                      | <i>First visit radiation<br/>oncologist<br/>until start radiotherapy</i> | 2.3                | 0.3–6.0                                                   |
| N=459                                               |                                                                          |                    |                                                           |
| <i>Emergency radiotherapy<br/>(single-fraction)</i> | <i>First visit radiation<br/>oncologist<br/>until start radiotherapy</i> | 0.2                | 0.03–2.9                                                  |
| N=275                                               |                                                                          |                    |                                                           |
