# Supplementary material
Source: PubMed Central journal article supplement (PMC4077439)

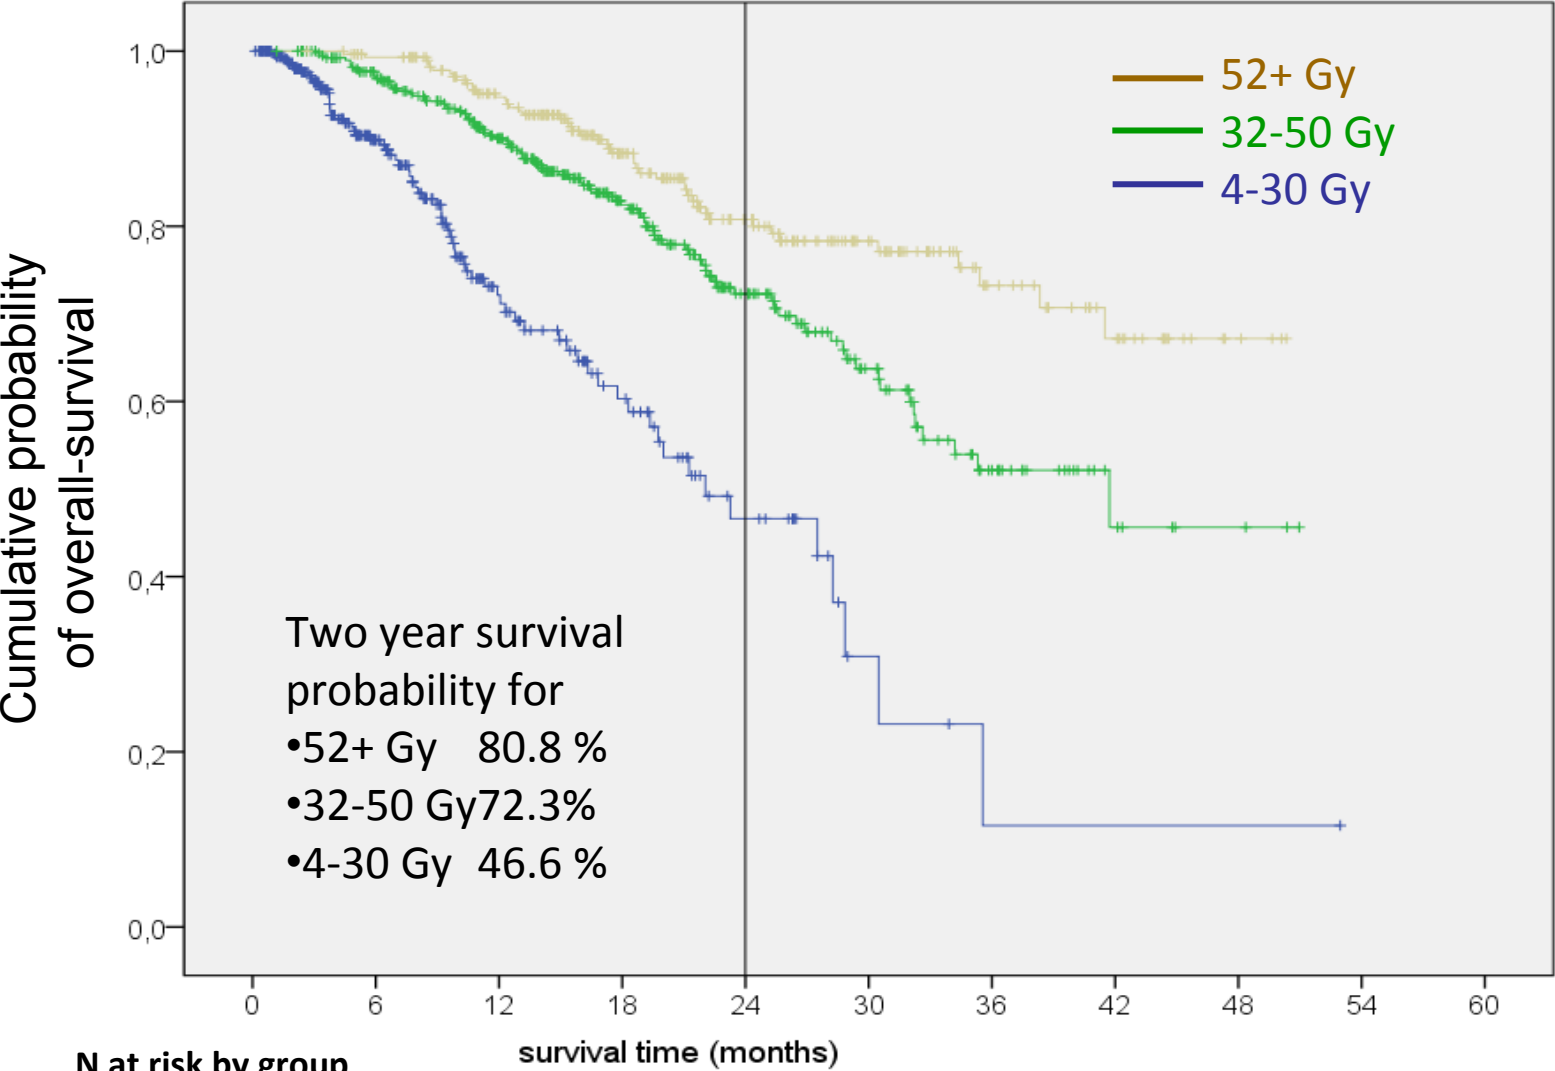

**N at risk by group**

|           | 0   | 6   | 12  | 18  | 24  | 30 | 36 | 42 | 48 | 54 |
|-----------|-----|-----|-----|-----|-----|----|----|----|----|----|
| 4-30 Gy   | 326 | 164 | 74  | 41  | 18  | 4  | 1  | 1  | 1  | 0  |
| 32-50 Gy  | 396 | 358 | 279 | 174 | 98  | 55 | 25 | 7  | 3  | 0  |
| 52-100 Gy | 290 | 280 | 236 | 161 | 106 | 66 | 33 | 19 | 4  | 0  |

Supplement: supp_the2013-0326_Supplemental_FigureS2.pdf [file supp_the2013-0326_Supplemental_FigureS2.pdf]
